# Supplementary material for: Evolutionary diversification of retinoic acid receptor ligand-binding pocket structure by molecular tinkering
Source: PubMed Central journal article supplement (PMC4821253; doi:10.1098/rsos.150484), 2016-03-16
Supplement: rsos150484supp3.pdf [file rsos150484supp3.pdf]

H1

H2

H3

H4

H5

1 YEMTPELEEDLIEKVRKAHQETFPSLCQLGKYTTNNSSDQRVTLDDLWDFSELSTKCIKIVFAKRLPGFTILTIAADQITLLKAACL  
 2 YEMTPELEEDLIEKVRKAHQETFPSLCQLGKYTTNNSSDQRVTLDDLWDFSELSTKCIKTVFAKRLPGFTILTIAADQITLLKAACL  
 3 YEMTPELEEDLIEKVRKAHQETFPSLCQLGKYTTNNSADHRVQLDLGLWDFSELATKCIKIVFAKRLPGFTSLTIAADQITLLKAACL  
 4 YEMTPELEEDLIEKVRKAHQETFPSLCQLGKYTTNNSADHRVQLDLGLWDFSELATKCIKIVFAKRLPGFTSLTIAADQITLLKAACL  
 5 YEMTPELEEDLIEKVRKAHQETFPSLCQLGKYTTNNSADHRVQLDLGLWDFSELATKCIKIVFAKRLPGFTSLTIAADQITLLKAACL  
 6 YELSSLEELVNVSKAHQETFPSLCQLGKYTTNNSADHRVQLDLGLWDFSELSTKCIKIVFAKRLPGFTILTIAADQITLLKAACL  
 7 YEMSPLEELIQVSKAHQETFPSLCQLGKYTTNNSADHRVQLDLGLWDFSELATKCIKIVFAKRLPGFTILTIAADQITLLKAACL

180 185 190 195 200 205 210 215 220 225 230 235 240 245 250 255 260 265

H5

S1

S2

H6

H7

H8

H9

1 DILILRICTRYTPEQDTMTFSDGLTLNRTQMHNAGFGPLTDLVFAFANQLLPLEMDDTETGLLSAICLICGDRQDLEEPKVDKLEEPL  
 2 DILILRICTRYTPEQDTMTFSDGLTLNRTQMHNAGFGPLTDLVFAFANQLLPLEMDDTETGLLSAICLICGDRQDLEEPKVDKLEEPL  
 3 DILILRICTRYTPEQDTMTFSDGLTLNRTQMHNAGFGPLTDLVFAFANQLLPLEMDDTETGLLSAICLICGDRQDLEEPKVDKLEEPL  
 4 DILILRICTRYTPEQDTMTFSDGLTLNRTQMHNAGFGPLTDLVFAFANQLLPLEMDDTETGLLSAICLICGDRQDLEEPKVDKLEEPL  
 5 DILILRICTRYTPEQDTMTFSDGLTLNRTQMHNAGFGPLTDLVFAFANQLLPLEMDDTETGLLSAICLICGDRQDLEEPKVDKLEEPL  
 6 DILMLRICTRYTPEQDTMTFSDGLTLNRTQMHNAGFGPLTDLVFAFAGQLLPLEMDDTETGLLSAICLICGDRMDLEEPKVDKLEEPL  
 7 DILMLRICTRYTPEQDTMTFSDGLTLNRTQMHNAGFGPLTDLVFAFAGQLLPLEMDDTETGLLSAICLICGDRMDLEEPKVDKLEEPL

270 275 280 285 290 295 300 305 310 315 320 325 330 335 340 345 350 355

H9

H10

H11

H12

1 LEALKIYVRKRRPNKPHMFPKMLMKITDLRGISAKGAERVITLKM EIPGSM PPLIQEML ENSDGP  
 2 LEALKIYVRKRRPNKPHMFPKMLMKITDLRGISAKGAERVITLKM EIPGSM PPLIQEML ENSDGP  
 3 LEALKIYVRRRRPNKPHMFPKMLMKITDLRGISAKGAERVITLKM EIPGSM PPLIQEML ENSDGP  
 4 LEALKIYVRRRRPNKPHMFPKMLMKITDLRGISAKGAERVITLKM EIPGSM PPLIQEML ENSDGP  
 5 LEALKIYVRRRRPNKPHMFPKMLMKITDLRGISAKGAERVITLKM EIPGSM PPLIQEML ENSDGP  
 6 LEALKIYARRRRPNKPHMFP RMLMKITDLRGISTKGAERAITLKM EIPG PMPPLIREML ENPEAF  
 7 LEALKIYARRRRPNKPHMFP RMLMKITDLRGISTKGAERAITLKM EIPG PMPPLIREML ENPEAF

360 365 370 375 380 385 390 395 400 405 410 415
